# Supplementary material for: A Data-Driven Mathematical Model of CA-MRSA Transmission among Age Groups: Evaluating the Effect of Control Interventions
Source: PLOS journal article supplement (doi:10.1371/journal.pcbi.1003328), 2013-11-21
Supplement: S5 (10.1371/journal.pcbi.1003328.s005) [file journal.pcbi.1003328.s005]

301 Moved Permanently

# Moved Permanently

The document has moved here.

---

Apache Server at www.ploscompbiol.org Port 80
